# Supplementary material for: An advanced tool integrating failure and sensitivity analysis into novel modeling of the stormwater flood volume
Source: Copernicus journal article supplement (doi:10.5194/hess-27-3329-2023), 2023-09-20
Supplement: Supplementary file 2 [file hess-27-3329-2023-supplement.pdf]

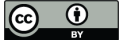

*Supplement of*

## **An advanced tool integrating failure and sensitivity analysis into novel modeling of the stormwater flood volume**

**Francesco Fatone et al.**

*Correspondence to:* Bartosz Szeląg (bszelag@tu.kielce.pl)

The copyright of individual parts of the supplement might differ from the article licence.

1 **S1. Uncertainty analysis - GLUE**

2 The problem of parameter identification in the GLUE method is formulated in the form of the Bayesian estimation  
 3 relation (Beven and Binley, 1992):

$$4 \quad P(Q/\theta) = \frac{L(Q/\theta)P(\theta)}{\int L(Q/\theta)P(\theta)} \quad (1)$$

5 where  $P(\theta)$  stands for *a priori* (Tab. S1) parameter distribution; the *a priori distribution* of SWMM parameters represents the  
 6 initial assumption of parameter variability. In the case of mathematical models used to describe surface runoff, usually there  
 7 is no knowledge of the structure of its distribution and the range of acceptable parameter values resulting from their physical  
 8 interpretation is known at most. In the analysed case it was assumed that the distribution has uniform character (. In the present  
 9 discussion the following form of the likelihood function was used (Romanowicz and Beven, 2000):

$$10 \quad L(Q/\theta) = \exp\left(\frac{-r_t}{\varepsilon \cdot V(r_t)}\right) \quad (2)$$

11  $V(\cdot)$  – variance,  $r_t$  - mean of the sum of squares of deviations of simulated value from measured value calculated as  
 12  $r_t = \frac{1}{l} \cdot \sum_{z=1}^l (Q_o - \hat{Q}_l)^2$  (where:  $Q_o$  and  $\hat{Q}_l$  denote z-th value from the times series of observed and computed flows;  $\varepsilon$  is a  
 13 scaling factor for the variance of model residua, used to adjust the width of the confidence intervals. In Kiczko et al. (2018)  
 14 study, the value of  $\varepsilon$  was determined, ensuring that 95% of observed discharge points is enclosed by 95% confidence intervals  
 15 of the model output. Equation (1) is solved using the Monte Carlo method. In the first step, a sample of parameters is developed  
 16 from an assumed *a priori* distribution. The model (SWMM in this case) is run with each combination of SWMM model  
 17 parameters (Tab. S1) and from the calculated and measured outflow hydrographs the values of the likelihood function and *a*  
 18 *posteriori* distributions are determined.

19

20 **Table S1. Ranges of SWMM model parameters**

21

| Parameters                                                            | Unit               | Range |       |
|-----------------------------------------------------------------------|--------------------|-------|-------|
|                                                                       |                    | Min   | Max   |
| Coefficient for flow path width ( $\alpha$ )                          | -                  | 2.7   | 4.7   |
| Retention depth of impervious areas ( $d_{imp}$ )                     | mm                 | 0.8   | 4.8   |
| Retention depth of pervious areas ( $d_{per}$ )                       | mm                 | 0.8   | 6.8   |
| Manning roughness coefficient for impervious areas ( $n_{imp}$ )      | $m^{-1/3} \cdot s$ | 0.01  | 0.022 |
| Manning roughness coefficient for pervious areas ( $n_{per}$ )        | $m^{-1/3} \cdot s$ | 0.16  | 0.2   |
| Manning roughness coefficient for sewer channels ( $n_{sew}$ )        | $m^{-1/3} \cdot s$ | 0.01  | 0.048 |
| Correction coefficient for sub-catchments slope ( $\gamma$ )          | -                  | 0.7   | 1.275 |
| Correction coefficient for percentage of impervious areas ( $\beta$ ) | -                  | 0.8   | 1.375 |

22

23

24

25 **Table S2. Corrective variants for stormwater system**

26

| Variants | Condition                                                                                                                                                                   |
|----------|-----------------------------------------------------------------------------------------------------------------------------------------------------------------------------|
| I        | $0.9 \cdot \text{Imp}$                                                                                                                                                      |
| II       | $0.9 \cdot \text{Imp} + (d_{\text{imp}} = 3.5\text{mm } n_{\text{imp}} = 0.035 \text{ m}^{-1/3} \cdot \text{s})$                                                            |
| III      | $0.9 \cdot \text{Imp} + (d_{\text{imp}} = 3.5\text{mm } n_{\text{imp}} = 0.035 \text{ m}^{-1/3} \cdot \text{s}) + (n_{\text{sew}} = 0.012 \text{ m}^{-1/3} \cdot \text{s})$ |

27

28 **S2. Measures of fit between computed results and measurements in a logistic regression model**

29 At the computation stage, the goal was to find such a value of threshold cut off which would provide maximum fit of  
 30 simulation to measurement data. Thus, the subsequent cut-off values  $p_m$  were tested until the best fit of measurement data and  
 31 computation results was obtained (SENS, SPEC  $\rightarrow$  max of value). The fit of the calculation results to measurements was  
 32 evaluated with the following measures: sensitivity (SENS – determines correctness of classification in a set when the threshold  
 33 values are exceeded), specificity (SPEC – determines correctness of classification in a set when the threshold values are not  
 34 exceeded) and accuracy (Acc), which were discussed in detail in Harrell (2001).

35 - accuracy (Acc)

36 
$$Acc = \frac{TP+TN}{TP+TN+FP+F} \quad (3)$$

37 - sensitivity (SENS)

38 
$$Sens = \frac{TP}{TP+FN} \quad (4)$$

39 and specificity (SPEC)

40 
$$Spec = \frac{TN}{TN+FP} \quad (5)$$

41 where  $TP, TN, FP$ , and  $FN$  denote true positives (correctly identified of the  $\kappa \geq 13 \text{ m}^3 \cdot \text{ha}^{-1}$ ), true negatives  
 42 (correctly identified lack of  $\kappa \geq 13 \text{ m}^3 \cdot \text{ha}^{-1}$ ), false positives ( $\kappa < 13 \text{ m}^3 \cdot \text{ha}^{-1}$  incorrectly identified as  $\kappa \geq 13 \text{ m}^3 \cdot \text{ha}^{-1}$ )  
 43 and false negatives ( $\kappa \geq 13 \text{ m}^3 \cdot \text{ha}^{-1}$  incorrectly identified as  $\kappa < 13 \text{ m}^3 \cdot \text{ha}^{-1}$ ), respectively.

44

45 **S3. Verification LRM model using SWMM**

46 The calculations included the following steps:

47 a) selection of two input data ( $x_1, x_2$ ) to change; the values of the other parameters were taken as the mean of the data according  
 48 to Table 1,

49 b) determination of combinations  $x_1, x_2$  for verification calculations such that:  $1.2 \cdot x_1 - 1.2 \cdot x_1, 1.2 \cdot x_1 - x_2, 1.2 \cdot x_1 - 0.8 \cdot x_2$ ;  
 50  $x_1 - 1.2 \cdot x_2, x_1 - x_2, x_1 - 0.8 \cdot x_2; 0.8 \cdot x_2 - 1.2 \cdot x_1, 0.8 \cdot x_2 - x_1, 0.8 \cdot x_2 - 0.8 \cdot x_1$ ; all combinations of catchment and sewer network  
 51 characteristics were analysed in this study, resulting in a total of 135 verification variants for 3 sub-catchments ( $135 \cdot 35 \cdot 3 =$   
 52 14175 simulations),

- 53 c) modification of sub-catchment characteristics according to point b)  
 54 d) calculation with a logit model and SWMM of the value of the specific flood volume.

55

#### 56 **S4. Regional model of convective rainfall**

57 To calculate the convective rainfall, the regional rainfall model for Poland was used (Kupczyk and  
 58 Suligowski, 2000; Suligowski, 2004). In this model the rainfall depth for the assumed rainfall duration is  
 59 determined from the formula:

$$60 \quad P_{con}(t_r) = a_1 \cdot t_r^2 + a_2 \cdot t_r + a_0 \quad (6)$$

61 where:  $t_r$  – duration of rainfall (min);  $P_{con}(t_r)$  – maximum convective rainfall depth (mm);  $a_0, a_1, a_2$  – empirical  
 62 coefficients determined by the method of least squares. The model includes data for 30 rainfall stations in Poland,  
 63 for which  $a_i$  ( $a_0, a_1, a_2$ ) coefficients were determined using rainfall data from the period of 20 - 30 years (Suligowski  
 64 2004). For the catchment area covered by the calculations (świętokrzyskie voivodship) the values are as follows:  
 65  $a_0 = 6.55$ ;  $a_1 = -1.10$ ,  $a_2 = 6.68$ .

66

#### 67 **S5. Probability of stormwater network failure**

68 The probability of specific flood volume for the limiting value of  $p_{m,cr}$  (exceeding it indicates that  $\kappa > 13$   
 69  $m^3 \cdot ha^{-1}$ ) can be written as:

$$70 \quad p_{m,cr} = \frac{exp(X)}{1+exp(X)} \quad (7)$$

71 By transforming equation (7), it can be stated that:

$$72 \quad X = \ln\left(\frac{p_{m,cr}}{1-p_{m,cr}}\right) \quad (8)$$

73 Knowing that  $X$  is a linear combination of the independent variables, the relationship can be written:

$$74 \quad X = X_{rain} + X_{catchm} + \left(\sum_{k=1}^m \alpha_k \cdot x_k + \alpha_{nsew} \cdot n_{sew}\right) \quad (9)$$

75 Comparing sides (8), (9) obtained:

$$76 \quad X_{rain} + X_{catchm} + \left(\sum_{k=1}^m \alpha_k \cdot x_k + \alpha_{nsew} \cdot n_{sew}\right) = \ln\left(\frac{p_{m,cr}}{1-p_{m,cr}}\right) \quad (10)$$

77 By transforming equation (10), the value of  $n_{sew}$  can be determined from the formula:

$$78 \quad n_{sew} = \frac{1}{\alpha_{nsew}} \cdot \left[ \ln\left(\frac{p_{m,cr}}{1-p_{m,cr}}\right) - X_{rain} - X_{catch} - \sum_{k=1}^m \alpha_k \cdot x_k \right] \quad (11)$$

79

80 **Table. S3. Values of coefficients ( $\alpha_i$ ), standard deviations ( $\sigma_i$ ), test probabilities (p) for the logit model to calculate the**  
 81 **probability of specific flood volume.**

82

| Variable  | Value ( $\alpha_i$ ) | St. derivation ( $\sigma_i$ ) | p – test |
|-----------|----------------------|-------------------------------|----------|
| Intercept | -54.146              | 1.863                         | < 0.0001 |
| $t_r$     | -0.218               | 0.001                         | < 0.0001 |
| $P_t$     | 4.055                | 0.036                         | < 0.0001 |
| $\alpha$  | 0.235                | 0.012                         | < 0.0001 |
| $n_{imp}$ | -79.397              | 1.251                         | < 0.0001 |
| $d_{imp}$ | -0.072               | 0.006                         | < 0.0001 |
| $\beta$   | 6.233                | 0.051                         | < 0.0001 |
| $\gamma$  | 0.333                | 0.043                         | < 0.0001 |
| $n_{sew}$ | 234.125              | 1.145                         | < 0.0001 |
| Imp       | 79.403               | 4.836                         | < 0.0001 |
| Vk        | -0.010               | 0.000                         | < 0.0001 |
| Gk        | -1967.036            | 113.936                       | < 0.0001 |
| Jkp       | -20.331              | 6.775                         | 0.0027   |
| Impd      | 42.912               | 2.389                         | < 0.0001 |
| Gkd       | -1169.004            | 66.862                        | < 0.0001 |

83

84

85 **Table. S4. Agreement of the results of calculating the probability of exceeding the specific flood volume with the logistic**  
 86 **regression model (LRM) and SWMM**

| $t_r$ [min] | Sub - catchment |   |   |   |   |   |   |   |   |
|-------------|-----------------|---|---|---|---|---|---|---|---|
|             | J               | K | L | M | N | O | P | R | S |
| variant I   |                 |   |   |   |   |   |   |   |   |
| 30          | +               | + | + | + | + | + | + | + | + |
| 40          | +               | + | + | + | + | + | + | + | + |
| 50          | +               | + | + | + | + | + | + | + | + |
| 60          | +               | + | + | + | + | + | + | - | - |
| variant III |                 |   |   |   |   |   |   |   |   |
| 30          | +               | + | + | + | + | + | + | + | + |
| 40          | +               | + | + | + | + | + | + | + | + |
| 50          | +               | + | + | + | + | + | + | + | + |
| 60          | +               | + | + | + | + | + | - | - | + |

87

88

89

90 **Table S5. Computational scenarios assumed for the verification of the obtained LRM by means of SWMM**

91

| Var  | ±   | Impd |   |     | Gk  |   |     | Gkd |   |     | Vk  |   |     | Jkp |   |     |
|------|-----|------|---|-----|-----|---|-----|-----|---|-----|-----|---|-----|-----|---|-----|
|      |     | +20  | 0 | -20 | +20 | 0 | -20 | +20 | 0 | -20 | +20 | 0 | -20 | +20 | 0 | -20 |
| Imp  | +20 | +    | + | +   | +   | + | +   | +   | + | +   | +   | + | +   | +   | + | +   |
|      | 0   | +    | + | +   | +   | + | +   | +   | + | +   | +   | + | +   | +   | + | +   |
|      | -20 | +    | + | +   | +   | + | +   | +   | + | +   | +   | + | +   | +   | + | +   |
| Impd | +20 |      |   |     | +   | + | +   | +   | + | +   | +   | + | +   | +   | + | +   |
|      | 0   |      |   |     | +   | + | +   | +   | + | +   | +   | + | +   | +   | + | +   |
|      | -20 |      |   |     | +   | + | +   | +   | + | +   | +   | + | +   | +   | + | +   |
| Gk   | +20 |      |   |     |     |   |     | +   | + | +   | +   | + | +   | +   | + | +   |
|      | 0   |      |   |     |     |   |     | +   | + | +   | +   | + | +   | +   | + | +   |
|      | -20 |      |   |     |     |   |     | +   | + | +   | +   | + | +   | +   | + | +   |
| Gkd  | +20 |      |   |     |     |   |     |     |   |     | +   | + | +   | +   | + | +   |
|      | 0   |      |   |     |     |   |     |     |   |     | +   | + | +   | +   | + | +   |
|      | -20 |      |   |     |     |   |     |     |   |     | +   | + | +   | +   | + | +   |
| Vk   | +20 |      |   |     |     |   |     |     |   |     |     |   |     | +   | + | +   |
|      | 0   |      |   |     |     |   |     |     |   |     |     |   |     | +   | + | +   |
|      | -20 |      |   |     |     |   |     |     |   |     |     |   |     | +   | + | +   |

92

93 **Table S6. Results of simulating the number of events ( $\kappa > 13 \text{ m}^3 \cdot \text{ha}^{-1}$ ) by the LRM for sub - catchment J**

| Var  | ±   | Impd |    |     | Gk  |    |     | Gkd |    |     | Vk  |    |     | Jkp |    |     |
|------|-----|------|----|-----|-----|----|-----|-----|----|-----|-----|----|-----|-----|----|-----|
|      |     | +20  | 0  | -20 | +20 | 0  | -20 | +20 | 0  | -20 | +20 | 0  | -20 | +20 | 0  | -20 |
| Imp  | +20 | 17   | 14 | 14  | 14  | 14 | 16  | 14  | 14 | 15  | 14  | 14 | 14  | 14  | 14 | 14  |
|      | 0   | 14   | 12 | 7   | 7   | 12 | 14  | 10  | 12 | 14  | 12  | 12 | 14  | 12  | 12 | 12  |
|      | -20 | 7    | 7  | 4   | 5   | 7  | 8   | 5   | 7  | 7   | 6   | 7  | 7   | 7   | 7  | 7   |
| Impd | +20 |      |    |     | 13  | 14 | 14  | 14  | 14 | 14  | 14  | 14 | 14  | 14  | 14 | 14  |
|      | 0   |      |    |     | 7   | 12 | 14  | 10  | 12 | 14  | 12  | 12 | 13  | 12  | 12 | 12  |
|      | -20 |      |    |     | 6   | 7  | 12  | 7   | 7  | 10  | 7   | 7  | 8   | 7   | 7  | 7   |
| Gk   | +20 |      |    |     |     |    |     | 7   | 14 | 10  | 7   | 14 | 8   | 7   | 14 | 7   |
|      | 0   |      |    |     |     |    |     | 10  | 12 | 14  | 12  | 12 | 13  | 12  | 12 | 12  |
|      | -20 |      |    |     |     |    |     | 14  | 7  | 14  | 14  | 7  | 14  | 14  | 7  | 14  |
| Gkd  | +20 |      |    |     |     |    |     |     |    |     | 9   | 14 | 7   | 10  | 14 | 10  |
|      | 0   |      |    |     |     |    |     |     |    |     | 12  | 12 | 8   | 12  | 12 | 12  |
|      | -20 |      |    |     |     |    |     |     |    |     | 14  | 7  | 14  | 14  | 7  | 14  |
| Vk   | +20 |      |    |     |     |    |     |     |    |     |     |    |     | 12  | 14 | 12  |
|      | 0   |      |    |     |     |    |     |     |    |     |     |    |     | 12  | 12 | 12  |
|      | -20 |      |    |     |     |    |     |     |    |     |     |    |     | 13  | 7  | 13  |

94

95 Table S7. Differences in simulation results of the number of events ( $\kappa > 13 \text{ m}^3 \cdot \text{ha}^{-1}$ ) by LRM and SWMM for sub-  
 96 catchment J

| Var  | ±   | Impd |   |     | Gk  |   |     | Gkd |   |     | Vk  |   |     | Jkp |   |     |
|------|-----|------|---|-----|-----|---|-----|-----|---|-----|-----|---|-----|-----|---|-----|
|      |     | +20  | 0 | -20 | +20 | 0 | -20 | +20 | 0 | -20 | +20 | 0 | -20 | +20 | 0 | -20 |
| Imp  | +20 | 3    | 3 | 2   | 2   | 3 | 2   | 2   | 3 | 3   | 2   | 3 | 3   | 2   | 3 | 2   |
|      | 0   | 3    | 2 | 1   | 2   | 2 | 2   | 2   | 2 | 2   | 3   | 2 | 3   | 2   | 2 | 2   |
|      | -20 | 1    | 1 | 0   | 1   | 1 | 1   | 1   | 1 | 0   | 1   | 1 | 1   | 1   | 1 | 1   |
| Impd | +20 |      |   |     | 2   | 3 | 2   | 2   | 3 | 3   | 2   | 3 | 2   | 2   | 3 | 2   |
|      | 0   |      |   |     | 2   | 2 | 2   | 2   | 2 | 2   | 3   | 2 | 3   | 2   | 2 | 2   |
|      | -20 |      |   |     | 1   | 1 | 3   | 1   | 1 | 2   | 1   | 1 | 2   | 1   | 1 | 1   |
| Gk   | +20 |      |   |     |     |   |     | 1   | 3 | 2   | 1   | 3 | 2   | 2   | 3 | 1   |
|      | 0   |      |   |     |     |   |     | 2   | 2 | 2   | 3   | 2 | 3   | 2   | 2 | 2   |
|      | -20 |      |   |     |     |   |     | 3   | 1 | 2   | 3   | 1 | 3   | 2   | 1 | 2   |
| Gkd  | +20 |      |   |     |     |   |     |     |   |     | 2   | 3 | 2   | 2   | 3 | 2   |
|      | 0   |      |   |     |     |   |     |     |   |     | 2   | 2 | 3   | 2   | 2 | 2   |
|      | -20 |      |   |     |     |   |     |     |   |     | 2   | 1 | 2   | 2   | 1 | 3   |
| Vk   | +20 |      |   |     |     |   |     |     |   |     |     |   |     | 2   | 3 | 2   |
|      | 0   |      |   |     |     |   |     |     |   |     |     |   |     | 2   | 2 | 2   |
|      | -20 |      |   |     |     |   |     |     |   |     |     |   |     | 2   | 1 | 2   |

97

98 Table S8. Results of simulating the number of events ( $\kappa > 13 \text{ m}^3 \cdot \text{ha}^{-1}$ ) by the LRM model for sub-catchment O

| Var  | ±   | Impd |    |     | Gk  |    |     | Gkd |    |     | Vk  |    |     | Jkp |    |     |
|------|-----|------|----|-----|-----|----|-----|-----|----|-----|-----|----|-----|-----|----|-----|
|      |     | +20  | 0  | -20 | +20 | 0  | -20 | +20 | 0  | -20 | +20 | 0  | -20 | +20 | 0  | -20 |
| Imp  | +20 | 14   | 14 | 8   | 9   | 14 | 14  | 13  | 14 | 14  | 12  | 14 | 14  | 14  | 14 | 12  |
|      | 0   | 14   | 7  | 5   | 6   | 7  | 12  | 7   | 7  | 8   | 7   | 7  | 9   | 7   | 7  | 7   |
|      | -20 | 7    | 5  | 3   | 4   | 5  | 7   | 4   | 5  | 5   | 4   | 5  | 6   | 5   | 5  | 4   |
| Impd | +20 |      |    |     | 8   | 14 | 14  | 12  | 14 | 14  | 11  | 14 | 14  | 13  | 14 | 13  |
|      | 0   |      |    |     | 6   | 7  | 12  | 7   | 7  | 8   | 7   | 7  | 9   | 7   | 7  | 7   |
|      | -20 |      |    |     | 4   | 5  | 7   | 5   | 5  | 6   | 4   | 5  | 7   | 5   | 5  | 5   |
| Gk   | +20 |      |    |     |     |    |     | 5   | 14 | 7   | 5   | 14 | 7   | 6   | 14 | 6   |
|      | 0   |      |    |     |     |    |     | 7   | 7  | 8   | 7   | 7  | 9   | 7   | 7  | 7   |
|      | -20 |      |    |     |     |    |     | 11  | 5  | 13  | 8   | 5  | 14  | 12  | 5  | 12  |
| Gkd  | +20 |      |    |     |     |    |     |     |    |     | 6   | 14 | 8   | 7   | 14 | 7   |
|      | 0   |      |    |     |     |    |     |     |    |     | 7   | 7  | 9   | 7   | 7  | 7   |
|      | -20 |      |    |     |     |    |     |     |    |     | 7   | 5  | 12  | 8   | 5  | 8   |
| Vk   | +20 |      |    |     |     |    |     |     |    |     |     |    |     | 7   | 14 | 7   |
|      | 0   |      |    |     |     |    |     |     |    |     |     |    |     | 7   | 7  | 7   |
|      | -20 |      |    |     |     |    |     |     |    |     |     |    |     | 9   | 5  | 10  |

100 **Table S9. Differences in simulation results of the number of events ( $\kappa > 13 \text{ m}^3 \cdot \text{ha}^{-1}$ ) by LRM and SWMM for**  
 101 **sub – catchment O**

| Var  | ±   | Impd |   |     | Gk  |   |     | Gkd |   |     | Vk  |   |     | Jkp |   |     |
|------|-----|------|---|-----|-----|---|-----|-----|---|-----|-----|---|-----|-----|---|-----|
|      |     | +20  | 0 | -20 | +20 | 0 | -20 | +20 | 0 | -20 | +20 | 0 | -20 | +20 | 0 | -20 |
| Imp  | +20 | 3    | 2 | 1   | 2   | 2 | 3   | 2   | 2 | 2   | 2   | 2 | 3   | 3   | 2 | 2   |
|      | 0   | 2    | 2 | 1   | 1   | 2 | 3   | 1   | 2 | 2   | 1   | 2 | 2   | 2   | 2 | 1   |
|      | -20 | 1    | 1 | 0   | 0   | 1 | 1   | 1   | 1 | 1   | 1   | 1 | 2   | 0   | 1 | 1   |
| Impd | +20 |      |   |     | 1   | 2 | 3   | 3   | 2 | 1   | 2   | 2 | 2   | 3   | 2 | 3   |
|      | 0   |      |   |     | 1   | 2 | 3   | 1   | 2 | 2   | 1   | 2 | 2   | 2   | 2 | 1   |
|      | -20 |      |   |     | 1   | 1 | 0   | 1   | 1 | 1   | 1   | 1 | 1   | 1   | 1 | 1   |
| Gk   | +20 |      |   |     |     |   |     | 1   | 2 | 1   | 1   | 2 | 2   | 1   | 2 | 1   |
|      | 0   |      |   |     |     |   |     | 1   | 2 | 2   | 1   | 2 | 2   | 2   | 2 | 1   |
|      | -20 |      |   |     |     |   |     | 2   | 1 | 2   | 2   | 1 | 3   | 2   | 1 | 3   |
| Gkd  | +20 |      |   |     |     |   |     |     |   |     | 1   | 2 | 2   | 1   | 2 | 1   |
|      | 0   |      |   |     |     |   |     |     |   |     | 1   | 2 | 2   | 2   | 2 | 1   |
|      | -20 |      |   |     |     |   |     |     |   |     | 1   | 1 | 3   | 1   | 1 | 1   |
| Vk   | +20 |      |   |     |     |   |     |     |   |     |     |   |     | 1   | 2 | 1   |
|      | 0   |      |   |     |     |   |     |     |   |     |     |   |     | 2   | 2 | 1   |
|      | -20 |      |   |     |     |   |     |     |   |     |     |   |     | 2   | 1 | 3   |

102 **Table S10. Results of simulating the number of events ( $\kappa > 13 \text{ m}^3 \cdot \text{ha}^{-1}$ ) by the LRM for sub-catchment S**

| Var  | ±   | Impd |    |     | Gk  |    |     | Gkd |    |     | Vk  |    |     | Jkp |    |     |
|------|-----|------|----|-----|-----|----|-----|-----|----|-----|-----|----|-----|-----|----|-----|
|      |     | +20  | 0  | -20 | +20 | 0  | -20 | +20 | 0  | -20 | +20 | 0  | -20 | +20 | 0  | -20 |
| Imp  | +20 | 22   | 16 | 14  | 14  | 16 | 21  | 14  | 16 | 16  | 14  | 16 | 21  | 16  | 16 | 16  |
|      | 0   | 15   | 14 | 9   | 11  | 14 | 14  | 14  | 14 | 14  | 12  | 14 | 14  | 14  | 14 | 14  |
|      | -20 | 13   | 7  | 5   | 5   | 7  | 12  | 5   | 7  | 7   | 6   | 7  | 11  | 7   | 7  | 7   |
| Impd | +20 |      |    |     | 14  | 16 | 21  | 14  | 16 | 15  | 14  | 16 | 19  | 15  | 16 | 15  |
|      | 0   |      |    |     | 11  | 14 | 14  | 14  | 14 | 14  | 12  | 14 | 14  | 14  | 14 | 14  |
|      | -20 |      |    |     | 7   | 7  | 14  | 8   | 7  | 9   | 7   | 7  | 13  | 9   | 7  | 9   |
| Gk   | +20 |      |    |     |     |    |     | 10  | 16 | 12  | 7   | 16 | 14  | 11  | 16 | 11  |
|      | 0   |      |    |     |     |    |     | 14  | 14 | 14  | 12  | 14 | 14  | 14  | 14 | 14  |
|      | -20 |      |    |     |     |    |     | 14  | 7  | 14  | 14  | 7  | 16  | 14  | 7  | 14  |
| Gkd  | +20 |      |    |     |     |    |     |     |    |     |     | 16 | 14  | 14  | 16 | 14  |
|      | 0   |      |    |     |     |    |     |     |    |     |     | 14 | 14  | 14  | 14 | 14  |
|      | -20 |      |    |     |     |    |     |     |    |     |     | 7  | 14  | 14  | 7  | 14  |
| Vk   | +20 |      |    |     |     |    |     |     |    |     |     |    |     |     | 16 | 12  |
|      | 0   |      |    |     |     |    |     |     |    |     |     |    |     |     | 14 | 14  |
|      | -20 |      |    |     |     |    |     |     |    |     |     |    |     |     | 7  | 14  |



103

104 **Table S11. Differences in simulation results of the number of events ( $\kappa > 13 \text{ m}^3 \cdot \text{ha}^{-1}$ ) by LRM and SWMM for**

105 **sub – catchment S**

| Var  | ±   | Impd |   |     | Gk  |   |     | Gkd |   |     | Vk  |   |     | Jkp |   |     |
|------|-----|------|---|-----|-----|---|-----|-----|---|-----|-----|---|-----|-----|---|-----|
|      |     | +20  | 0 | -20 | +20 | 0 | -20 | +20 | 0 | -20 | +20 | 0 | -20 | +20 | 0 | -20 |
| Impd | +20 | 4    | 3 | 3   | 2   | 3 | 2   | 3   | 3 | 2   | 3   | 3 | 4   | 3   | 3 | 2   |
|      | 0   | 3    | 3 | 2   | 2   | 2 | 2   | 2   | 2 | 2   | 2   | 2 | 2   | 3   | 2 | 2   |
|      | -20 | 3    | 1 | 1   | 1   | 1 | 2   | 1   | 1 | 1   | 0   | 1 | 2   | 1   | 1 | 1   |
| Impd | +20 |      |   |     | 2   | 3 | 4   | 3   | 3 | 2   | 2   | 3 | 3   | 3   | 3 | 2   |
|      | 0   |      |   |     | 2   | 2 | 2   | 2   | 2 | 2   | 2   | 2 | 2   | 3   | 2 | 2   |
|      | -20 |      |   |     | 2   | 1 | 3   | 1   | 1 | 1   | 0   | 1 | 3   | 2   | 1 | 1   |
| Gk   | +20 |      |   |     |     |   |     | 2   | 3 | 2   | 1   | 3 | 3   | 2   | 3 | 2   |
|      | 0   |      |   |     |     |   |     | 2   | 2 | 2   | 2   | 2 | 2   | 3   | 2 | 2   |
|      | -20 |      |   |     |     |   |     | 2   | 1 | 3   | 2   | 1 | 3   | 2   | 1 | 2   |
| Gkd  | +20 |      |   |     |     |   |     |     |   |     |     | 3 | 3   | 2   | 3 | 2   |
|      | 0   |      |   |     |     |   |     |     |   |     |     | 2 | 2   | 3   | 2 | 2   |
|      | -20 |      |   |     |     |   |     |     |   |     |     | 1 | 3   | 2   | 1 | 2   |
| Vk   | +20 |      |   |     |     |   |     |     |   |     |     |   |     |     | 3 | 2   |
|      | 0   |      |   |     |     |   |     |     |   |     |     |   |     |     | 2 | 2   |
|      | -20 |      |   |     |     |   |     |     |   |     |     |   |     |     | 1 | 2   |

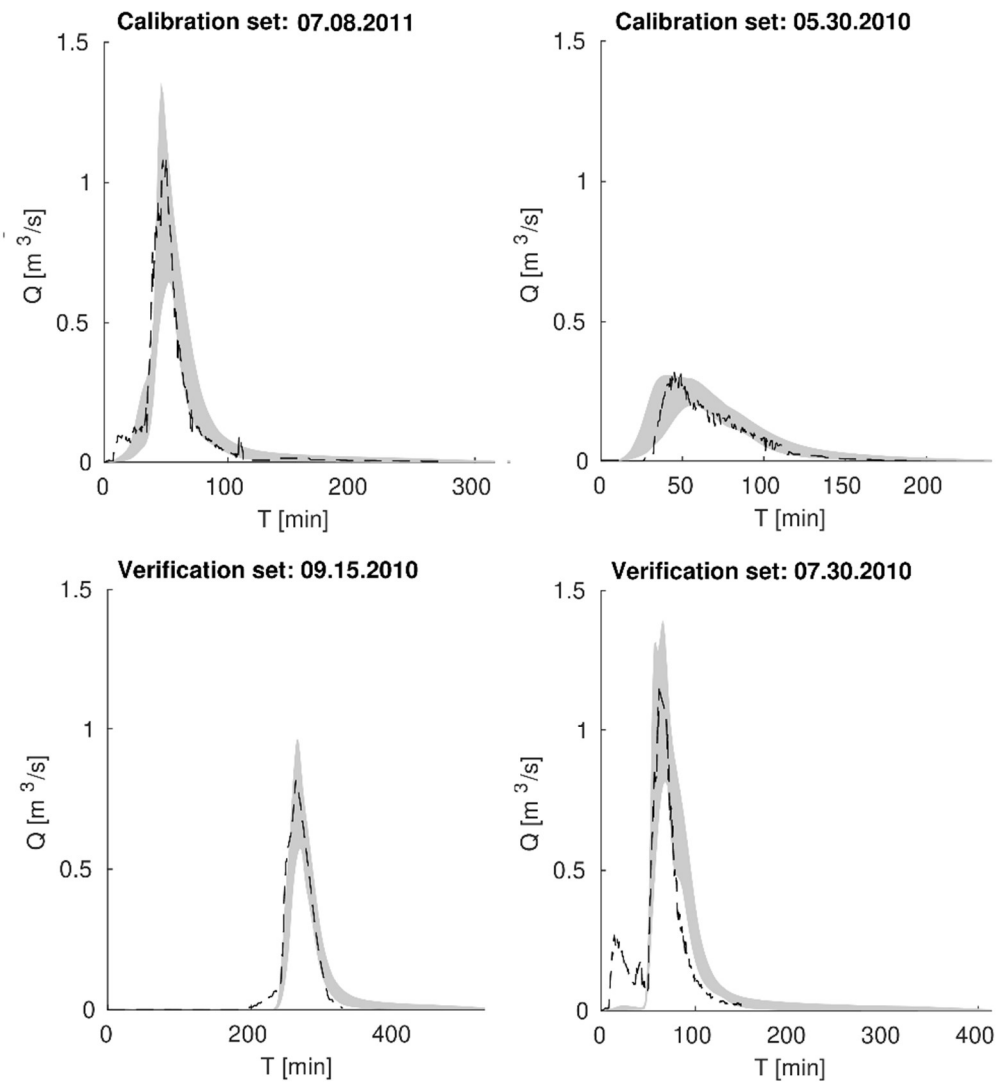

106

107 **Figure S1. Comparison of the measured hydrographs of stormwater runoff from the catchment with 95% confidence**  
 108 **intervals determined via the SWMM model.**

109

110

111

112

113

114

115

116

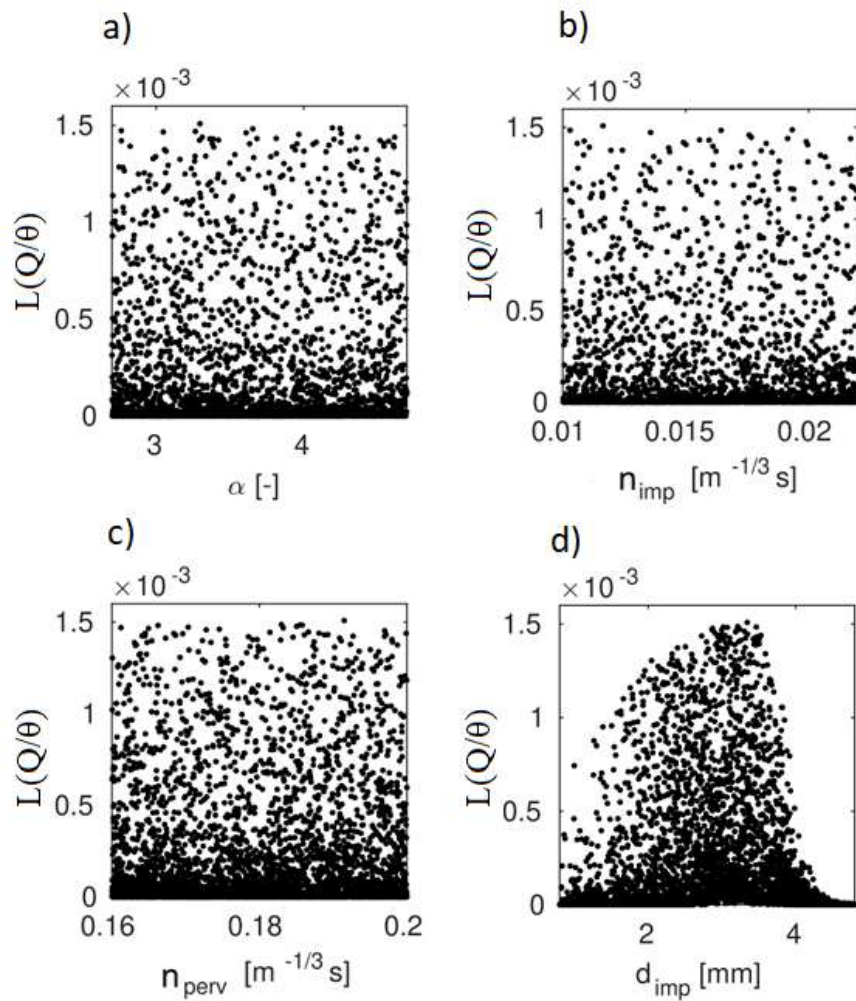

118

119 **Figure S2. Influence of (a) coefficient for flow path width ( $\alpha$ ), (b) Manning roughness coefficient for impervious areas**120 **( $n_{\text{imp}}$ ), (c) Manning roughness coefficient for pervious areas ( $n_{\text{per}}$ ) and retention depth of impervious areas ( $d_{\text{imp}}$ ) on**121 **the likelihood function ( $L(Q/\theta)$ ).**

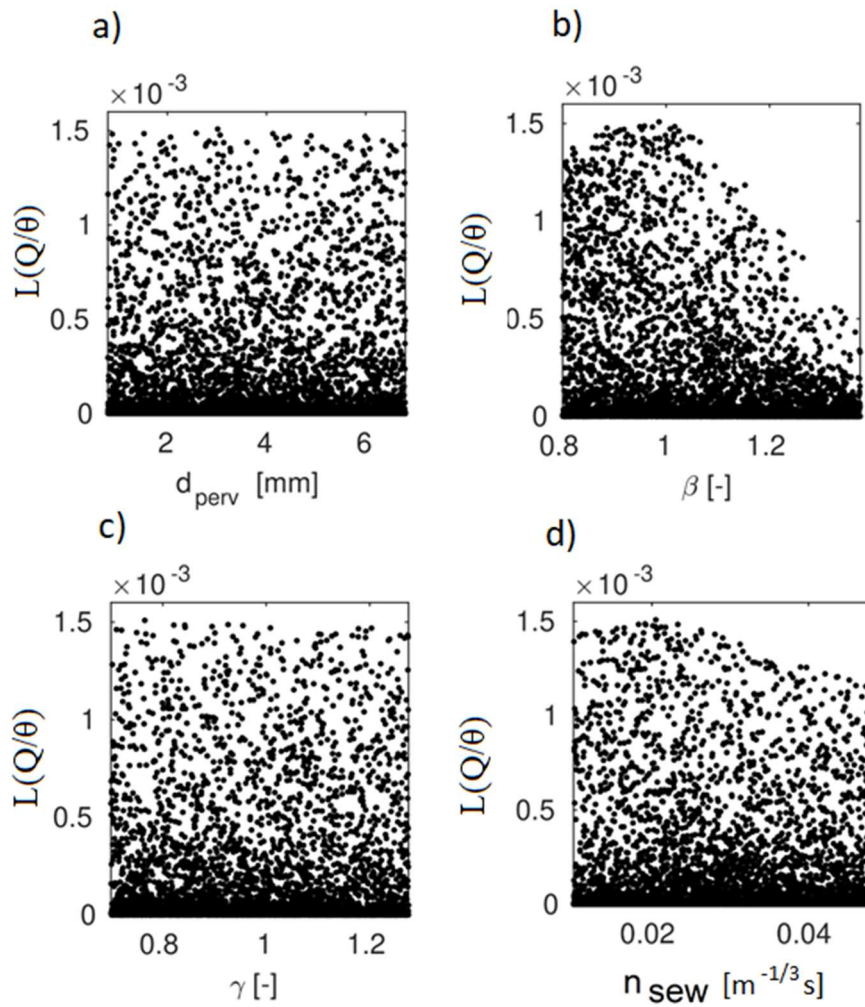

122

123

124

125

126

127

128

129

130

131

132

133

134

**Figure S3. Influence of (a) retention depth of pervious areas ( $d_{\text{perv}}$ ), (b) correction coefficient for percentage of impervious areas ( $\beta$ ), (c) correction coefficient for sub-catchments slope ( $\gamma$ ) and Manning roughness coefficient for sewer channels ( $n_{\text{sew}}$ ) on the likelihood function ( $L(Q/\theta)$ ).**

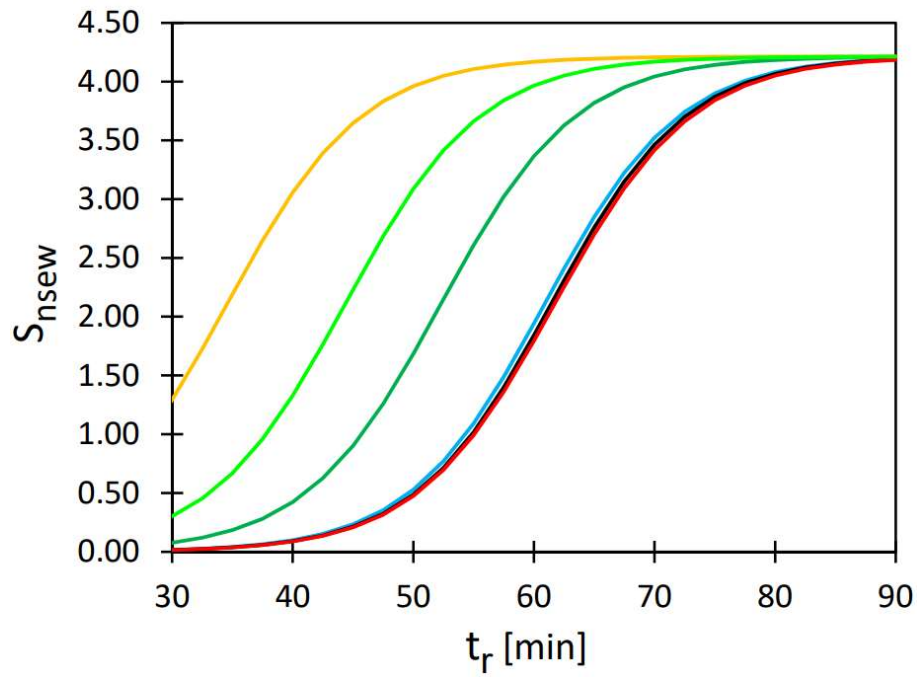

135  
136  
137  
138

Figure S4. Influence of rainfall duration ( $t_r$ ) depending on catchment and stormwater network characteristics ( $Imp$ ,  $Impd$ ,  $Vk$ ,  $Jkp$ ,  $Gk$ ) on the sensitivity coefficient  $S_{nsew}$ .

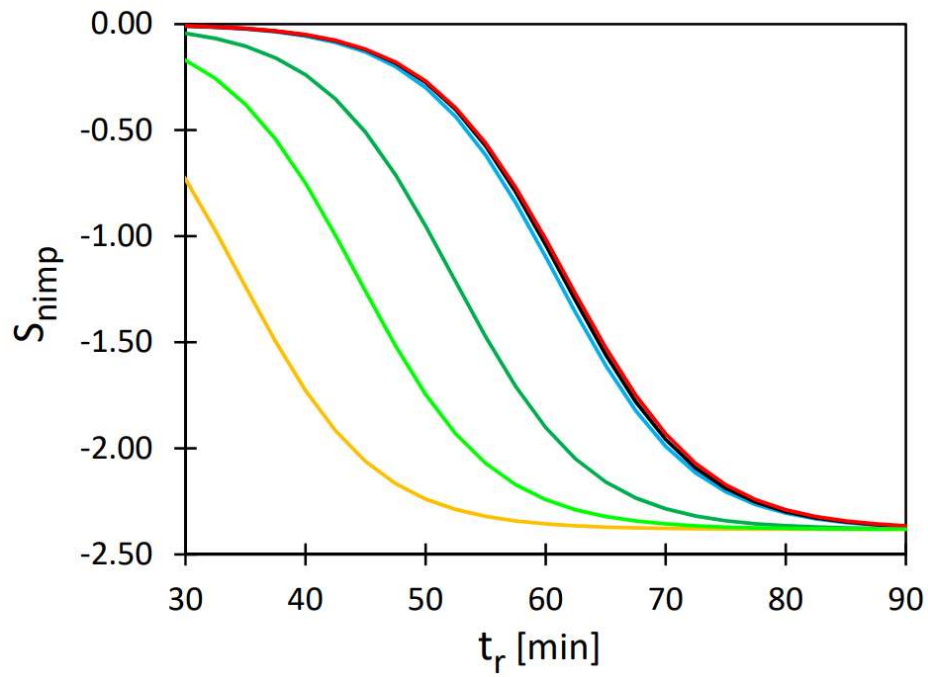

139  
140  
141  
142

Figure S5. Influence of rainfall duration ( $t_r$ ) depending on catchment and stormwater network characteristics ( $Imp$ ,  $Impd$ ,  $Vk$ ,  $Jkp$ ,  $Gk$ ) on the sensitivity coefficient  $S_{nimp}$ .

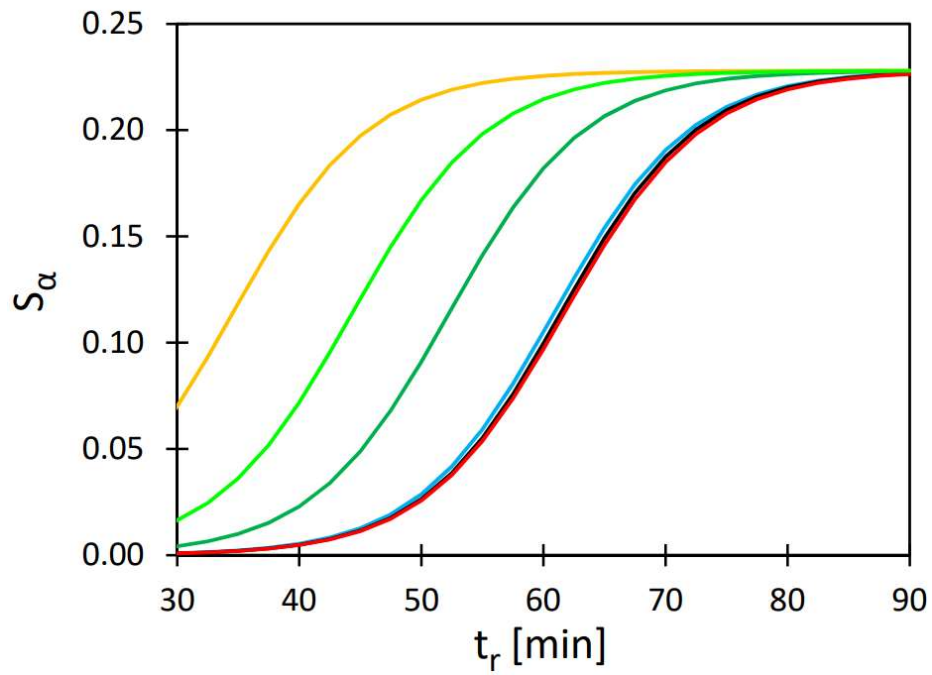

143

144 **Figure S6. Influence of rainfall duration ( $t_r$ ) depending on catchment and stormwater network characteristics (Imp,**  
 145 **Impd, Vk, Jkp, Gk) on the sensitivity coefficient  $S_\alpha$ .**

146

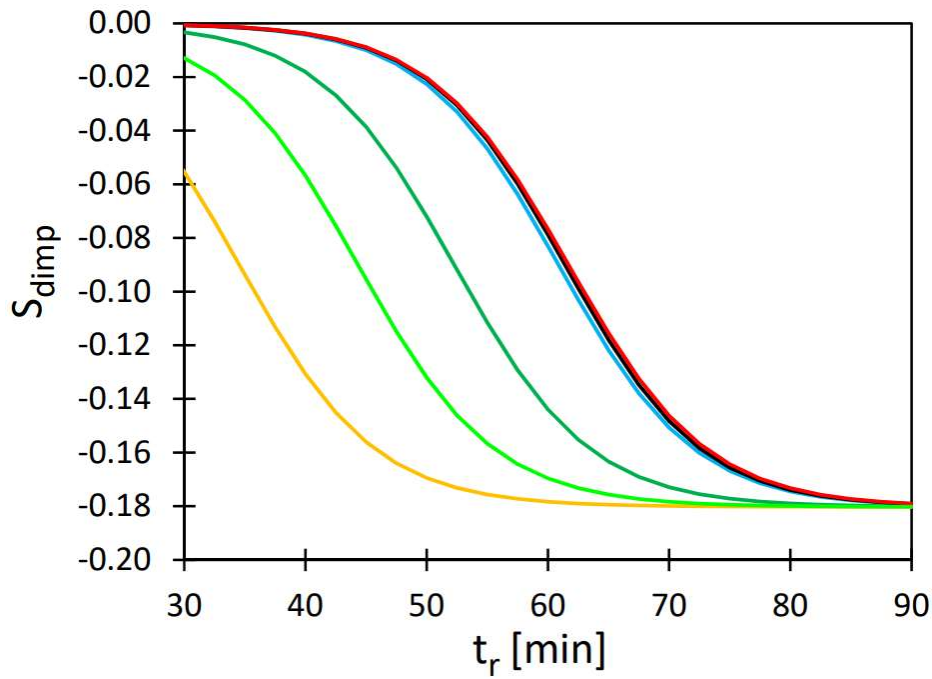

147

148 **Figure S7. Influence of rainfall duration ( $t_r$ ) depending on catchment and stormwater network characteristics (Imp,**  
 149 **Impd, Vk, Jkp, Gk) on the sensitivity coefficient  $S_{dimp}$ .**

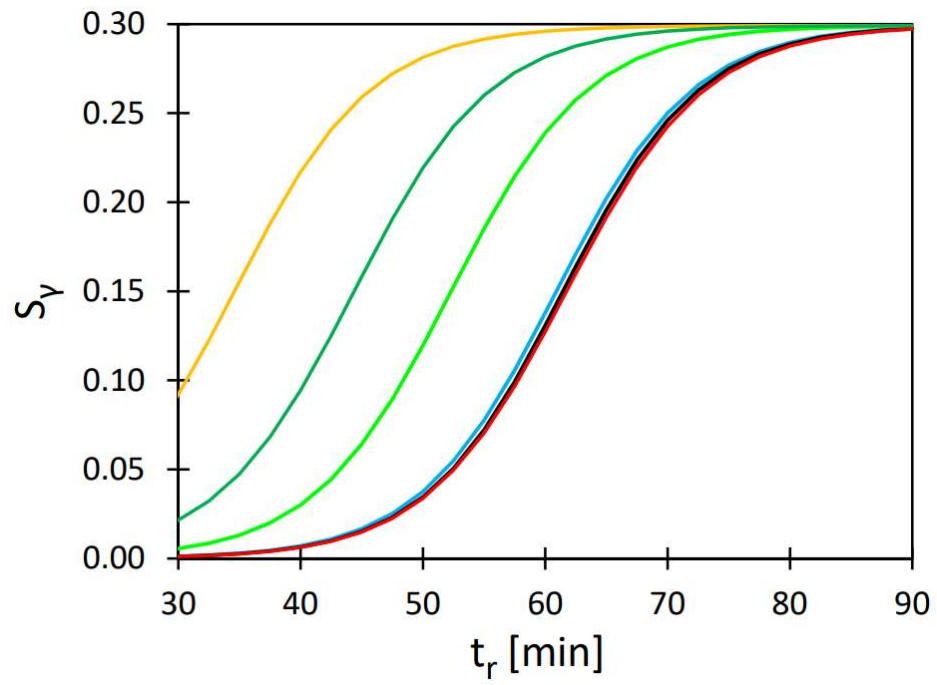

151

152 **Figure S8. Influence of rainfall duration ( $t_r$ ) depending on catchment and stormwater network characteristics (Imp,**  
153 **Impd, Vk, Jkp, Gk) on the sensitivity coefficient  $S_\gamma$ .**

154

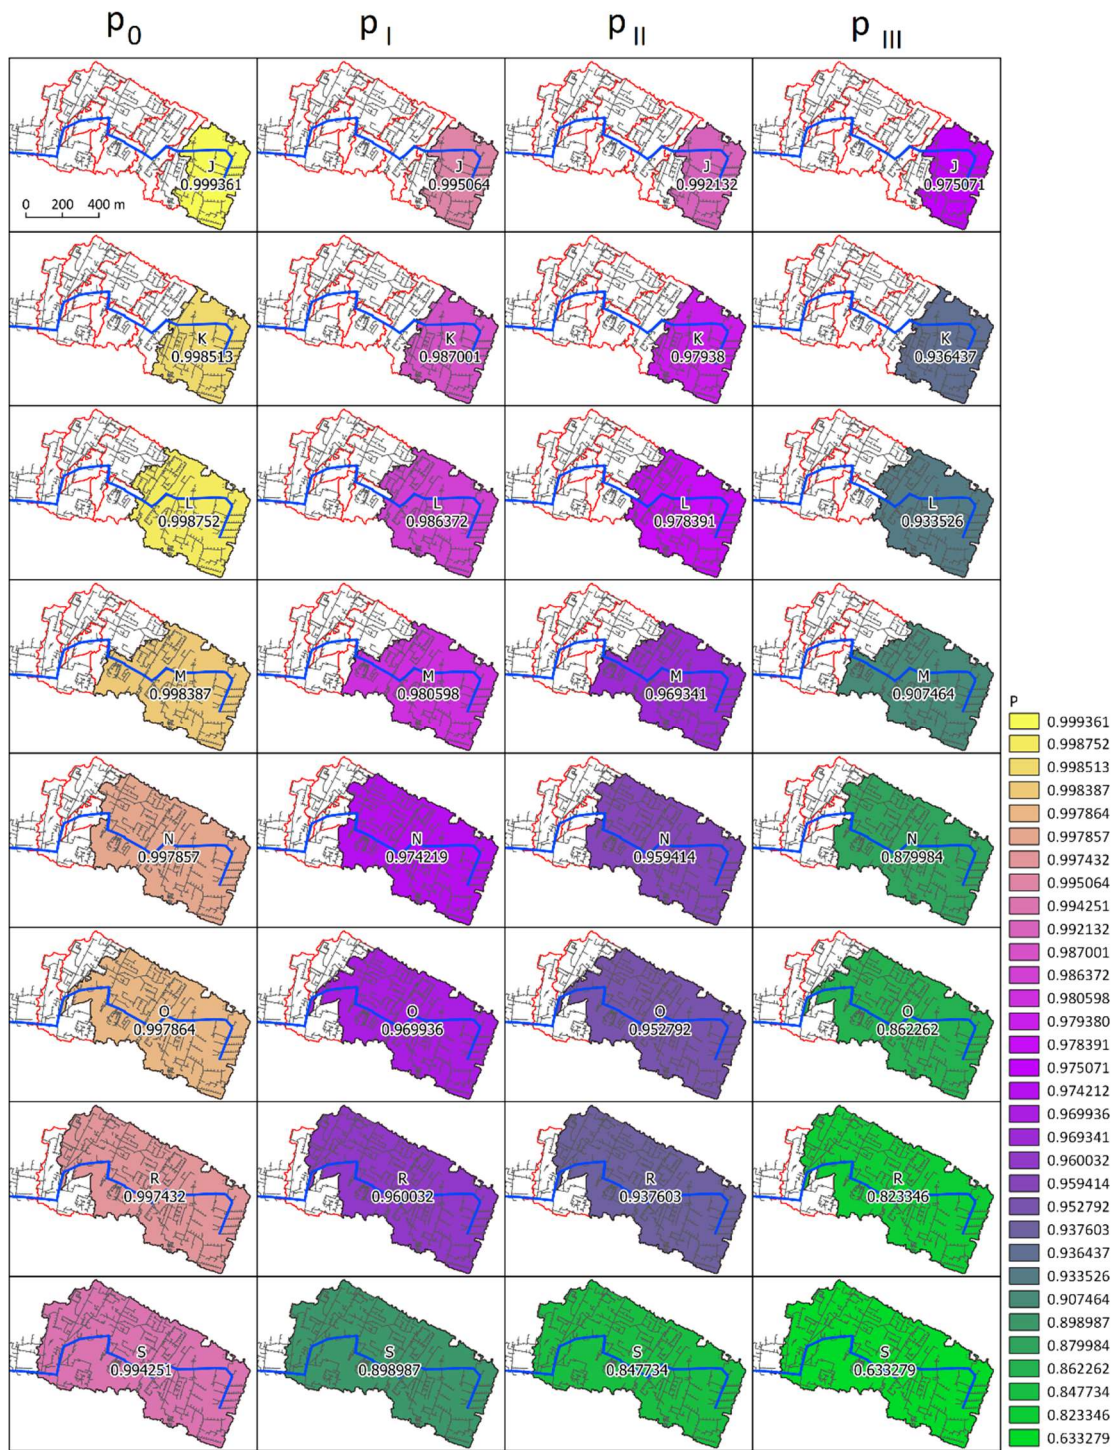

155

156 **Figure S9. Probability of specific flood volume for separate sub-catchments (J, K, L, M, N, O, R, S) for the current**

157

**state and corrective variants (I, II, III).**



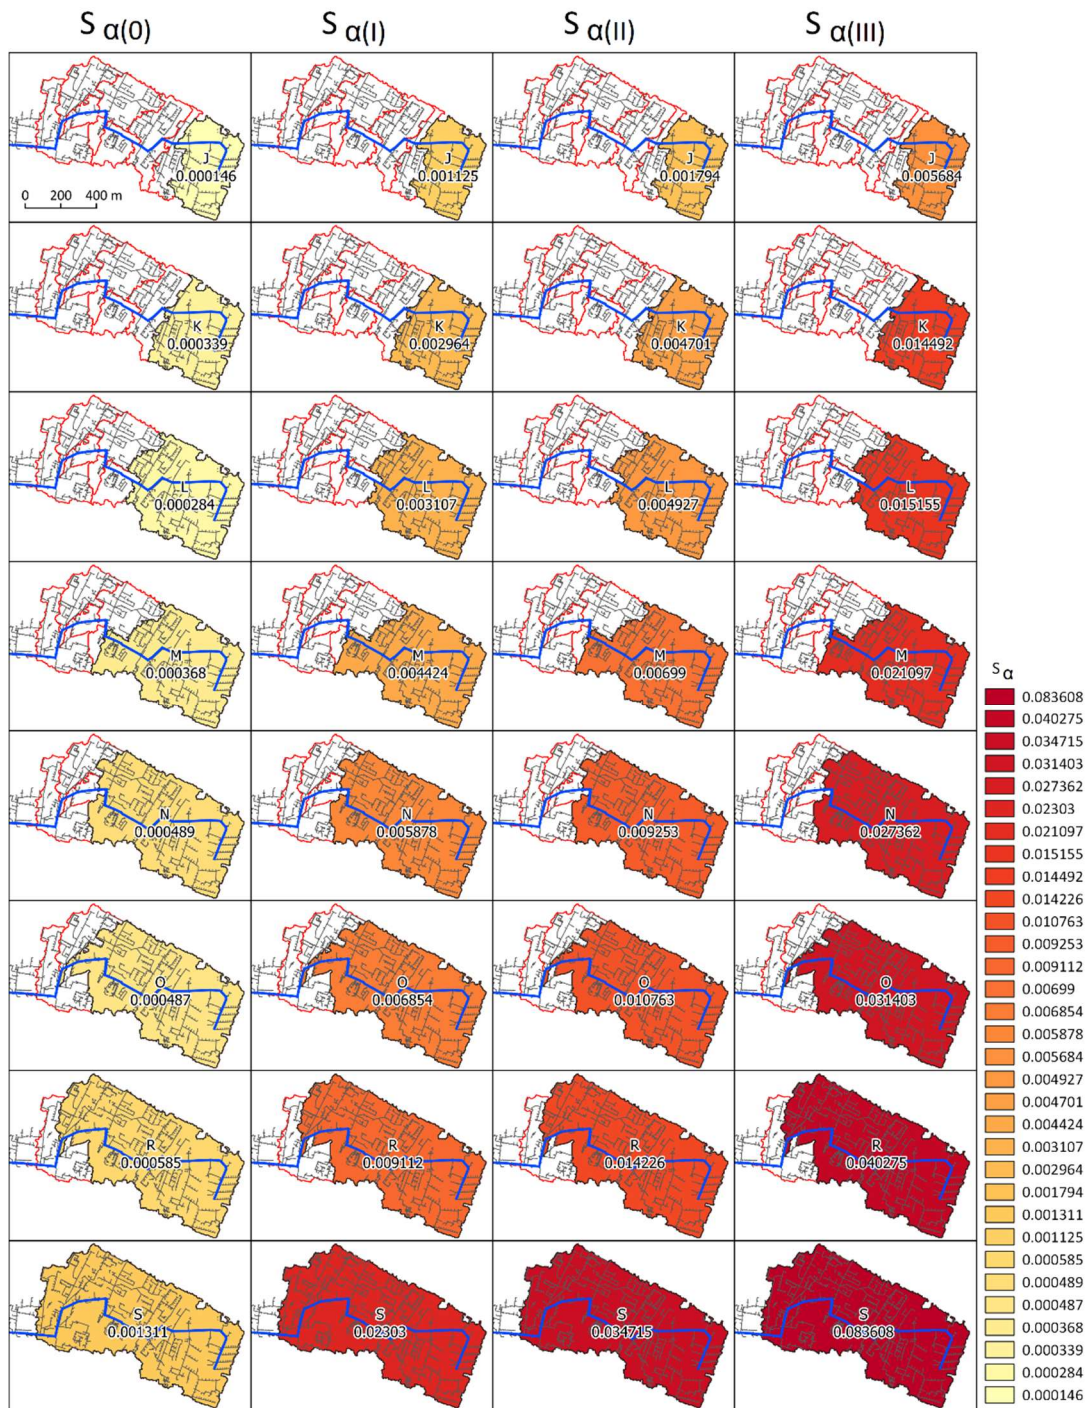

159

160 **Figure S10. Sensitivity coefficient  $S_{\alpha}$  for separated of the sub-catchments (J, K, L, M, N, O, R, S) for the current state**  
 161 **and corrective variants (I, II, III).**

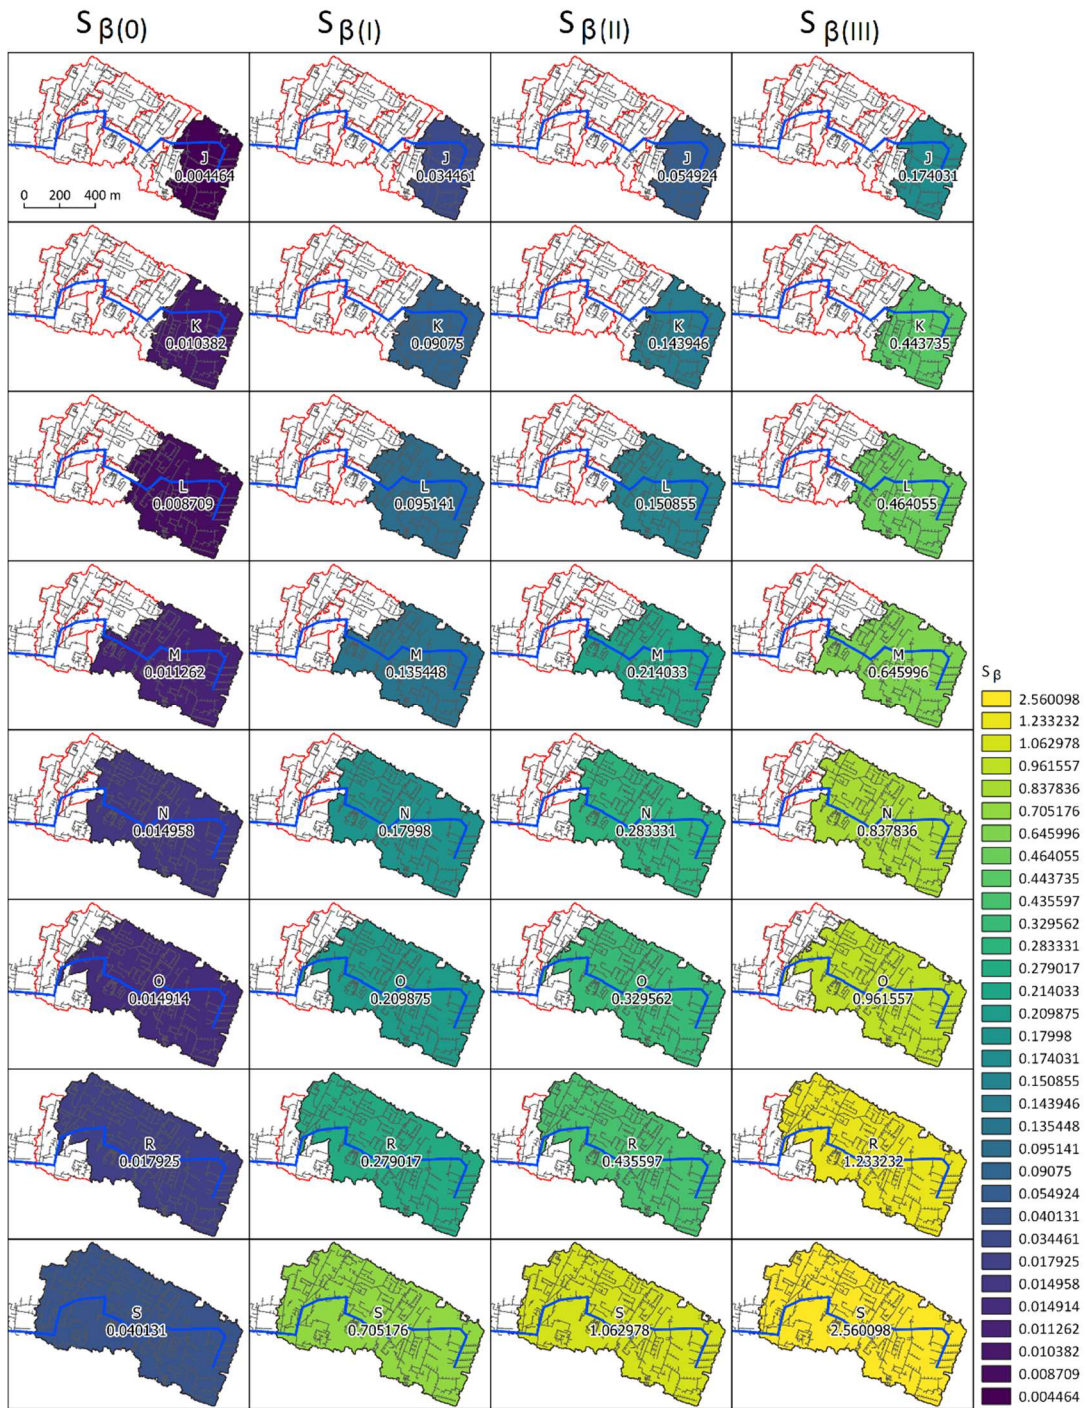

163

164 **Figure S11. Sensitivity coefficient  $S_{\beta}$  for separated of the sub-catchments (J, K, L, M, N, O, R, S) for the current state**

165

**and corrective variants (I, II, III).**

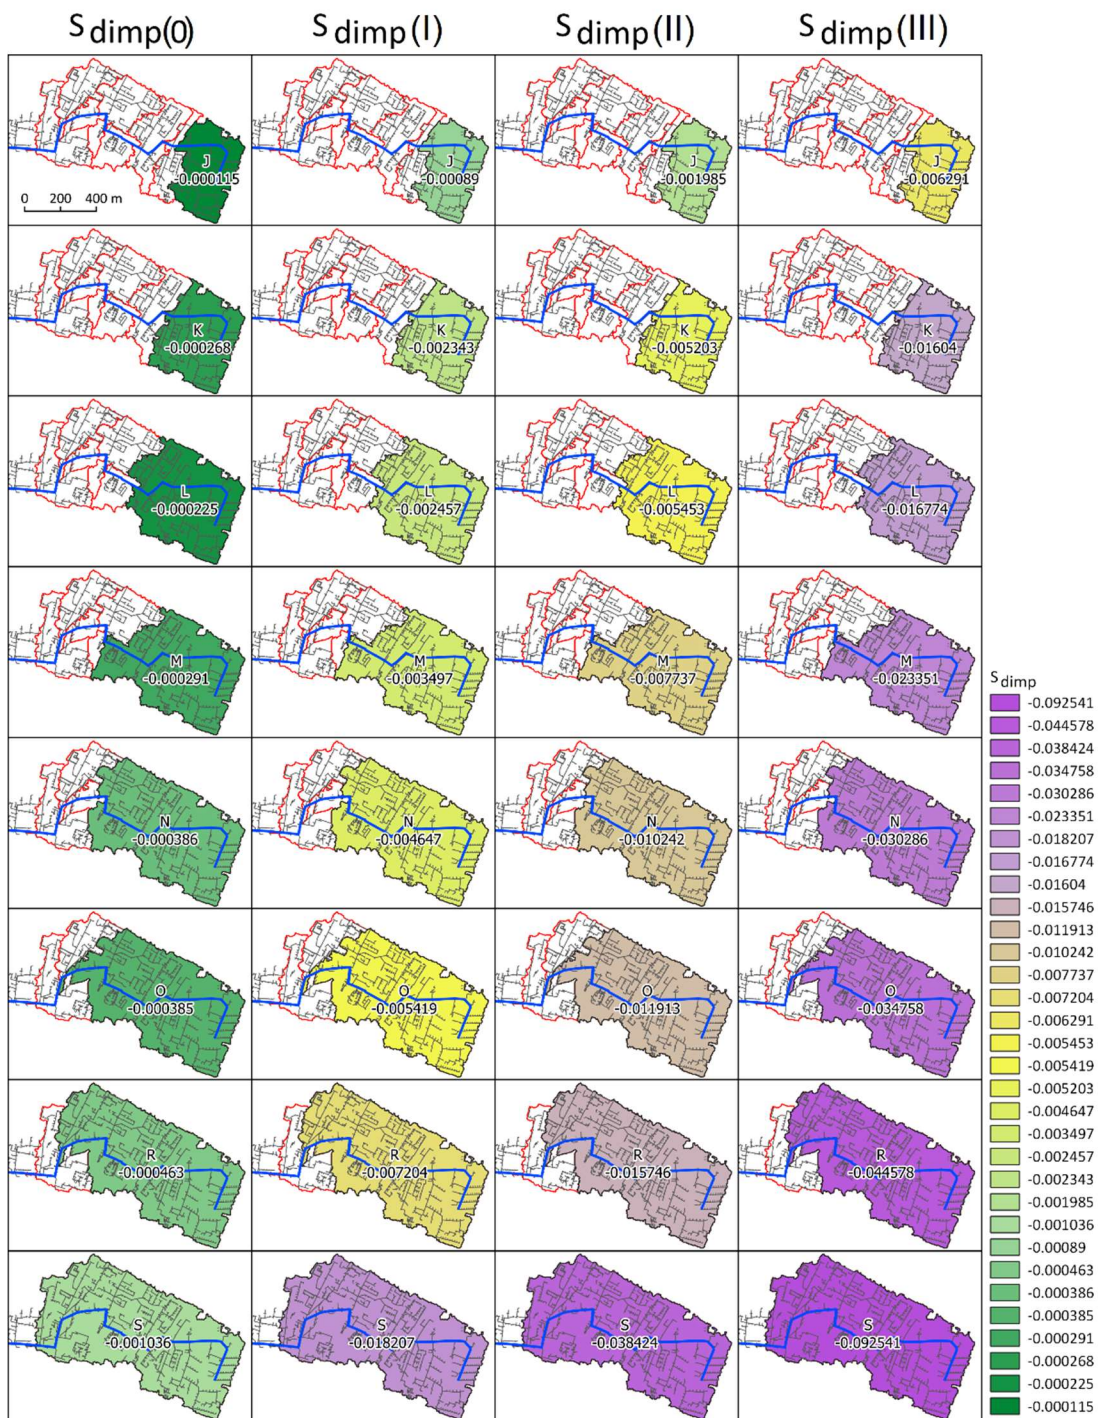

167

168 **Figure S12. Sensitivity coefficient  $S_{dimp}$  for separated of the sub-catchments (J, K, L, M, N, O, R, S) for the current**  
 169 **state and corrective variants (I, II, III).**

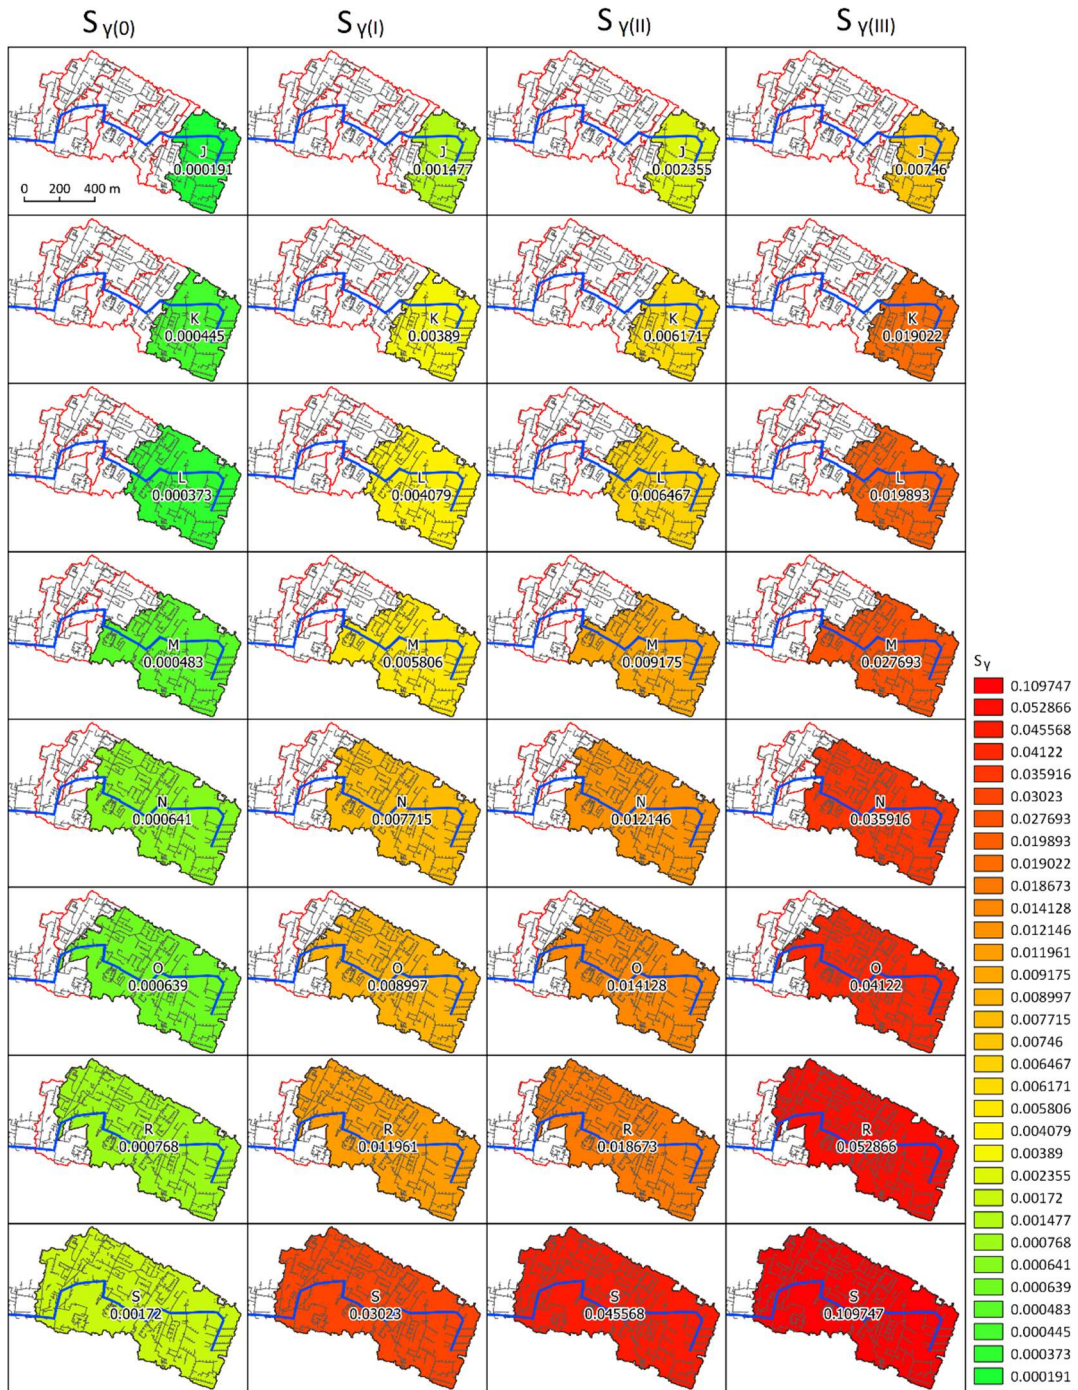

171

172 **Figure S13. Sensitivity coefficient  $S_{\gamma}$  for separated of the sub-catchments (J, K, L, M, N, O, R, S) for the current state**  
 173 **and corrective variants (I, II, III).**

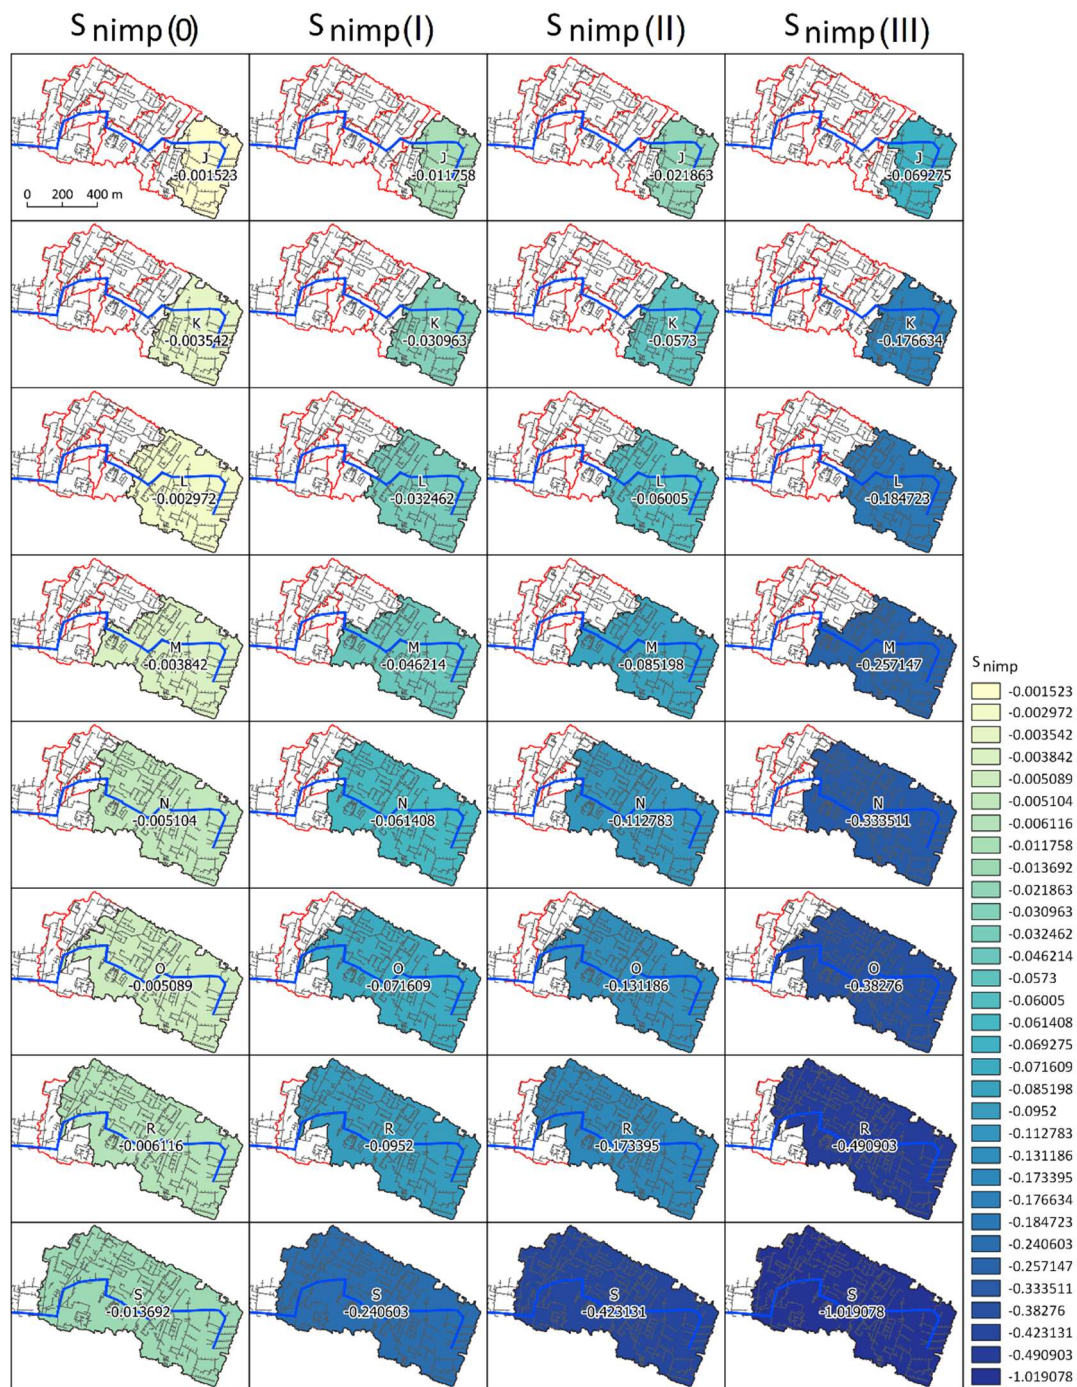

175  
176  
177  
178

Figure S14. Sensitivity coefficient  $S_{nimp}$  for separated of the sub-catchments (J, K, L, M, N, O, R, S) for the current state and corrective variants (I, II, III).

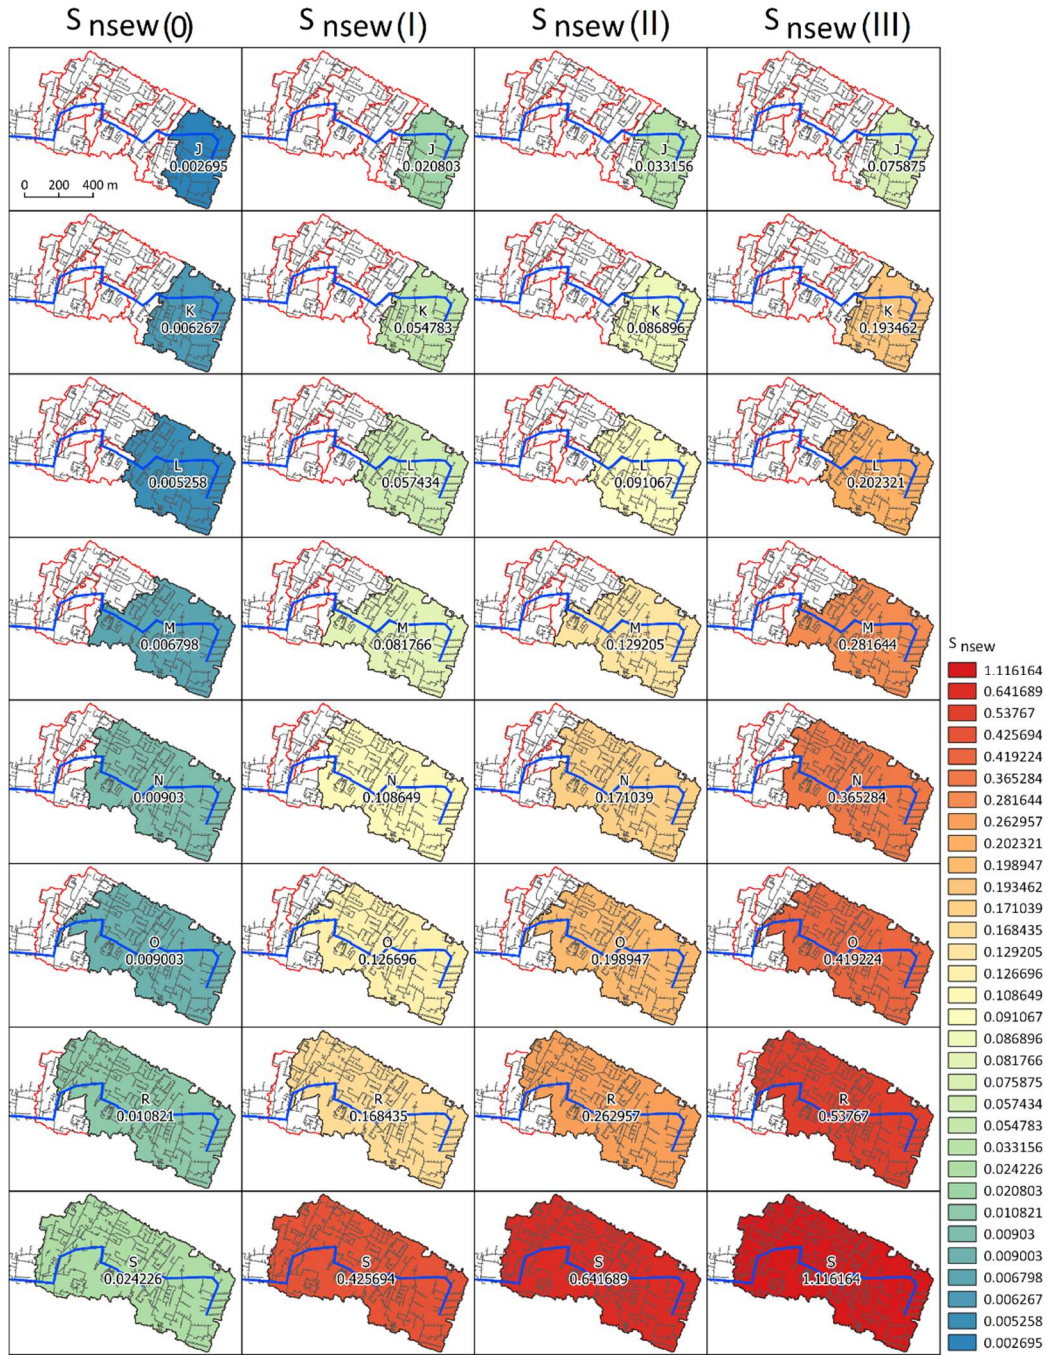

180

181 **Figure S15. Sensitivity coefficient  $S_{nsew}$  for separated of the sub-catchments (J, K, L, M, N, O, R, S) for the current**  
 182 **state and corrective variants (I, II, III).**

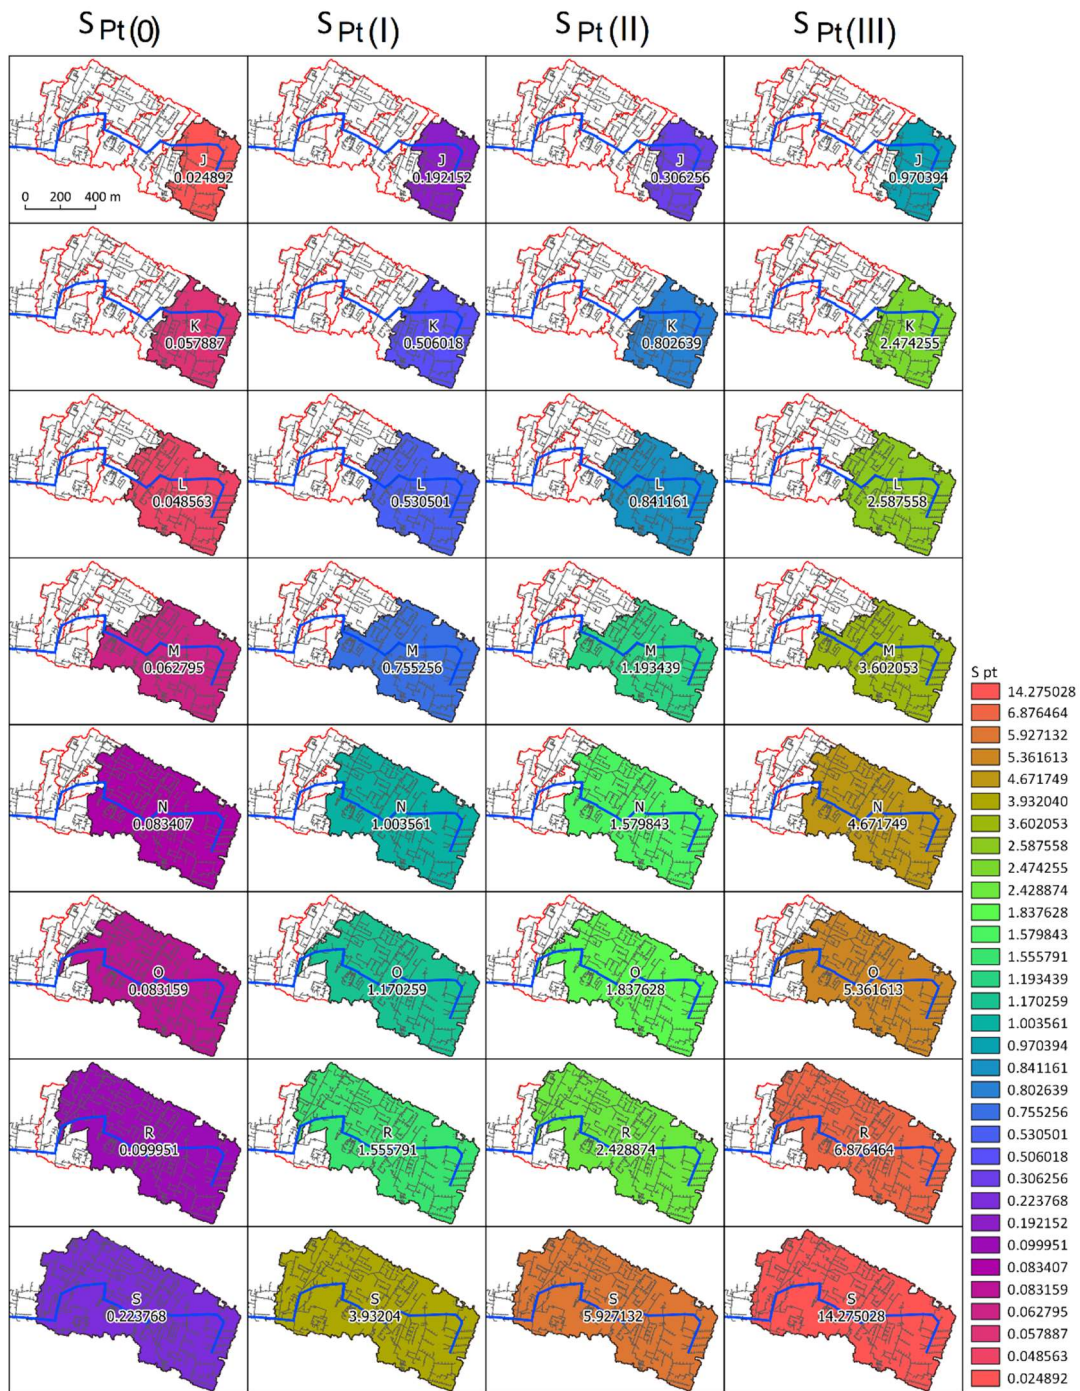

184  
 185 **Figure S16. Sensitivity coefficient  $S_{Pt}$  for separated of the sub-catchments (J, K, L, M, N, O, R, S) for the current state**  
 186 **and corrective variants (I, II, III).**

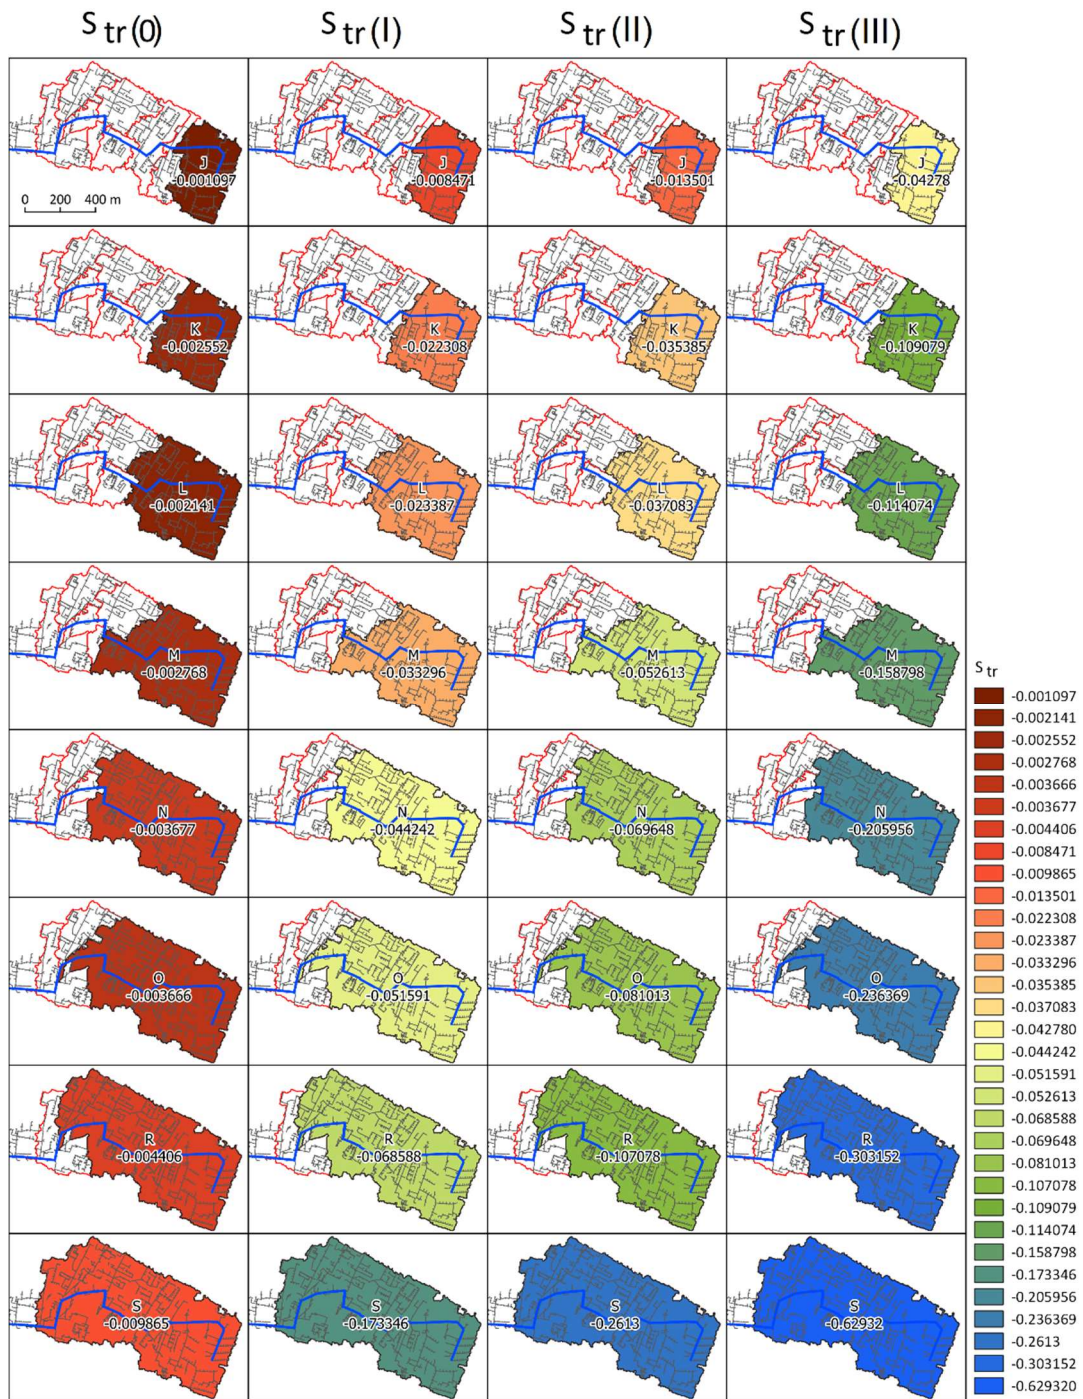

188

189 **Figure S17. Sensitivity coefficient  $S_{tr}$  for separated of the sub-catchments (J, K, L, M, N, O, R, S) for the current state**

190 **and corrective variants (I, II, III).**



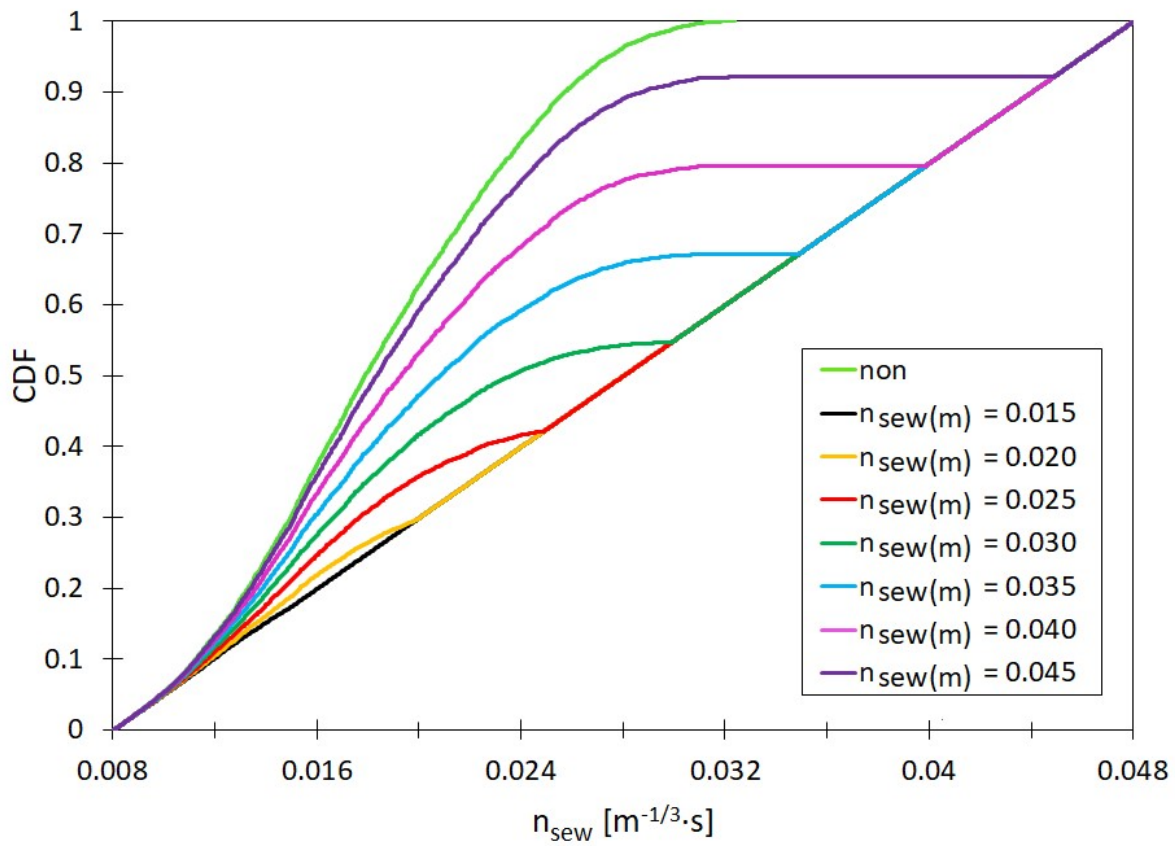

192

193

194

195

**Figure S18. Empirical distributions of Manning roughness coefficients of channels ( $n_{sew}$ ) for  $n_{sew(m)}=0.015 - 0.045 m^{-1/3} \cdot s$ ,  $Imp = 0.35$  and  $Impd = 0.42$ .**

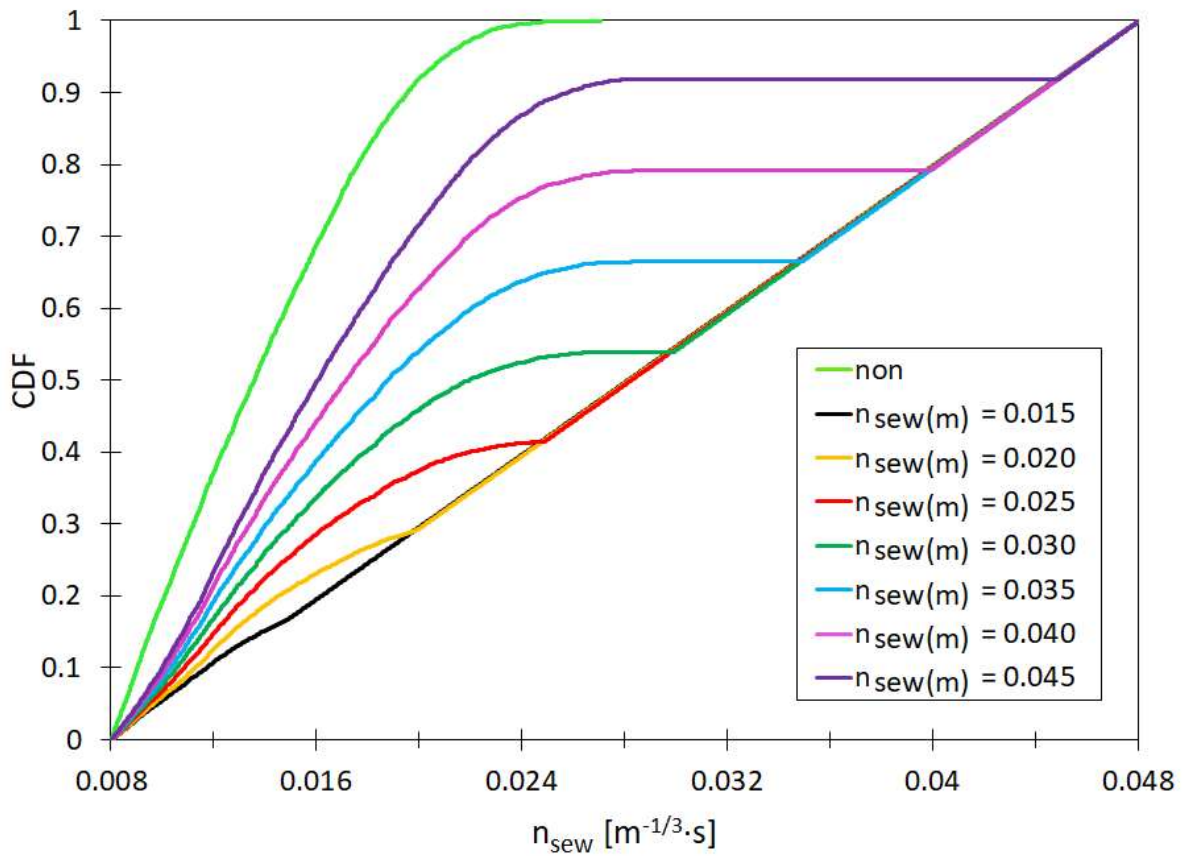

196  
 197  
 198  
 199  
 200  
 201

**Figure S19. Empirical distributions of Manning roughness coefficients for channels ( $n_{sew}$ ) for  $n_{sew(m)}=0.015 - 0.045 m^{-1/3} \cdot s$ ,  $Imp = 0.35$  and  $Impd = 0.40$ .**
